# Supplementary material for: Retrotransposons as pathogenicity factors of the plant pathogenic fungus Botrytis cinerea
Source: bioRxiv or medRxiv preprint supplement (doi:10.1101/2021.04.13.439636), 2021-04-23
Supplement: Supplementary file [file media-1.pdf]

### Consensus classes

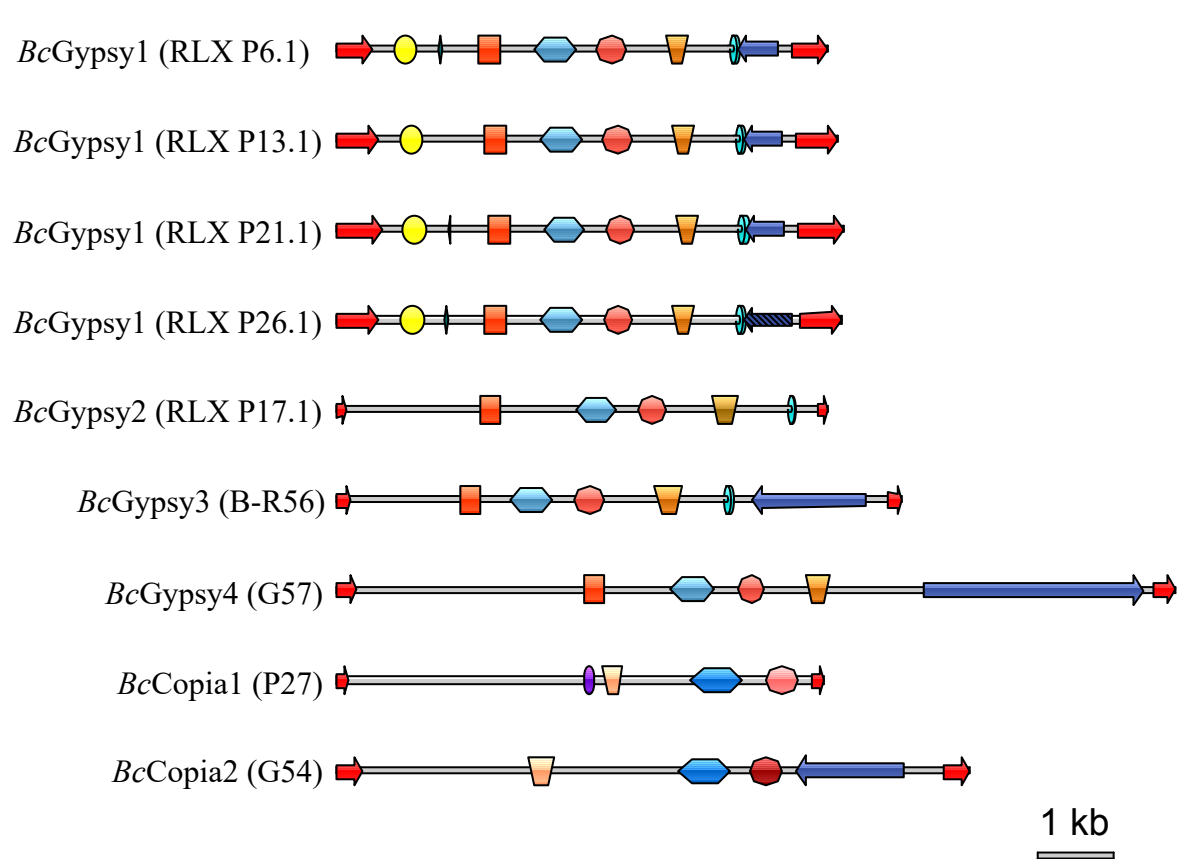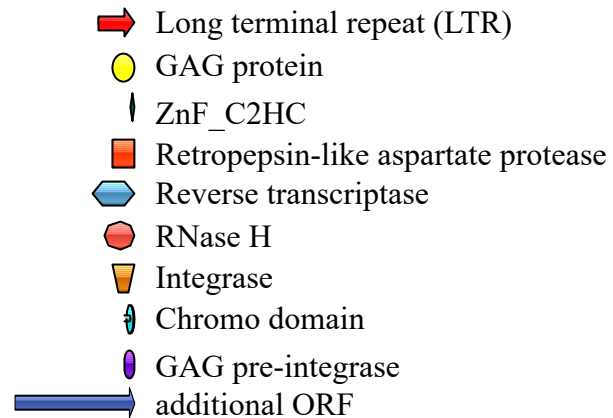

Figure S1

A

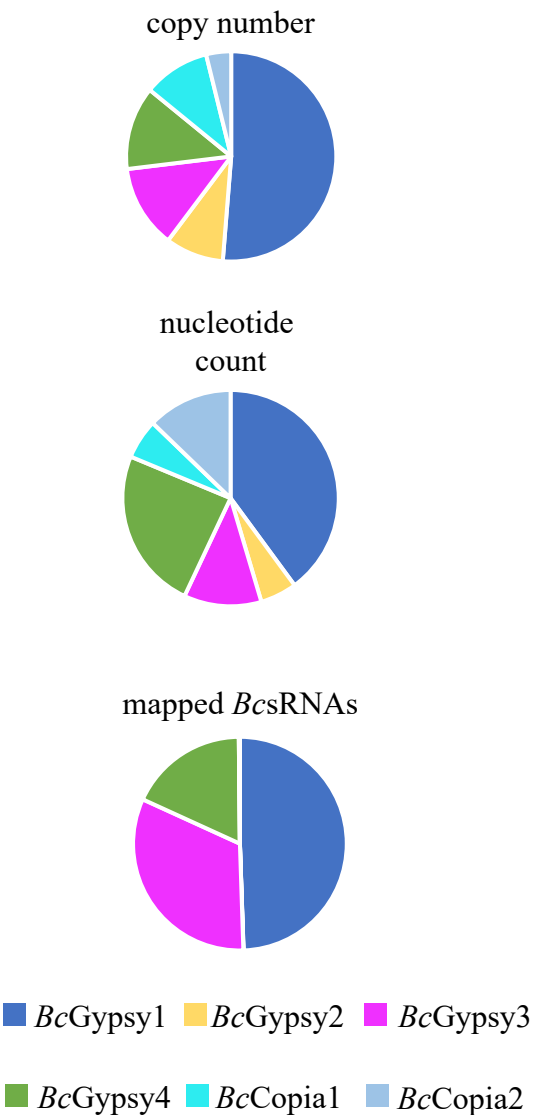

B

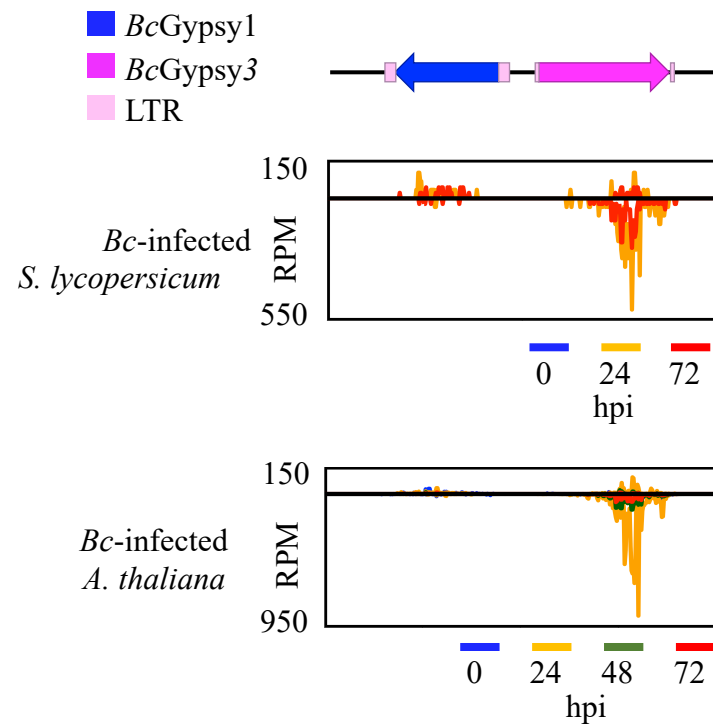

C

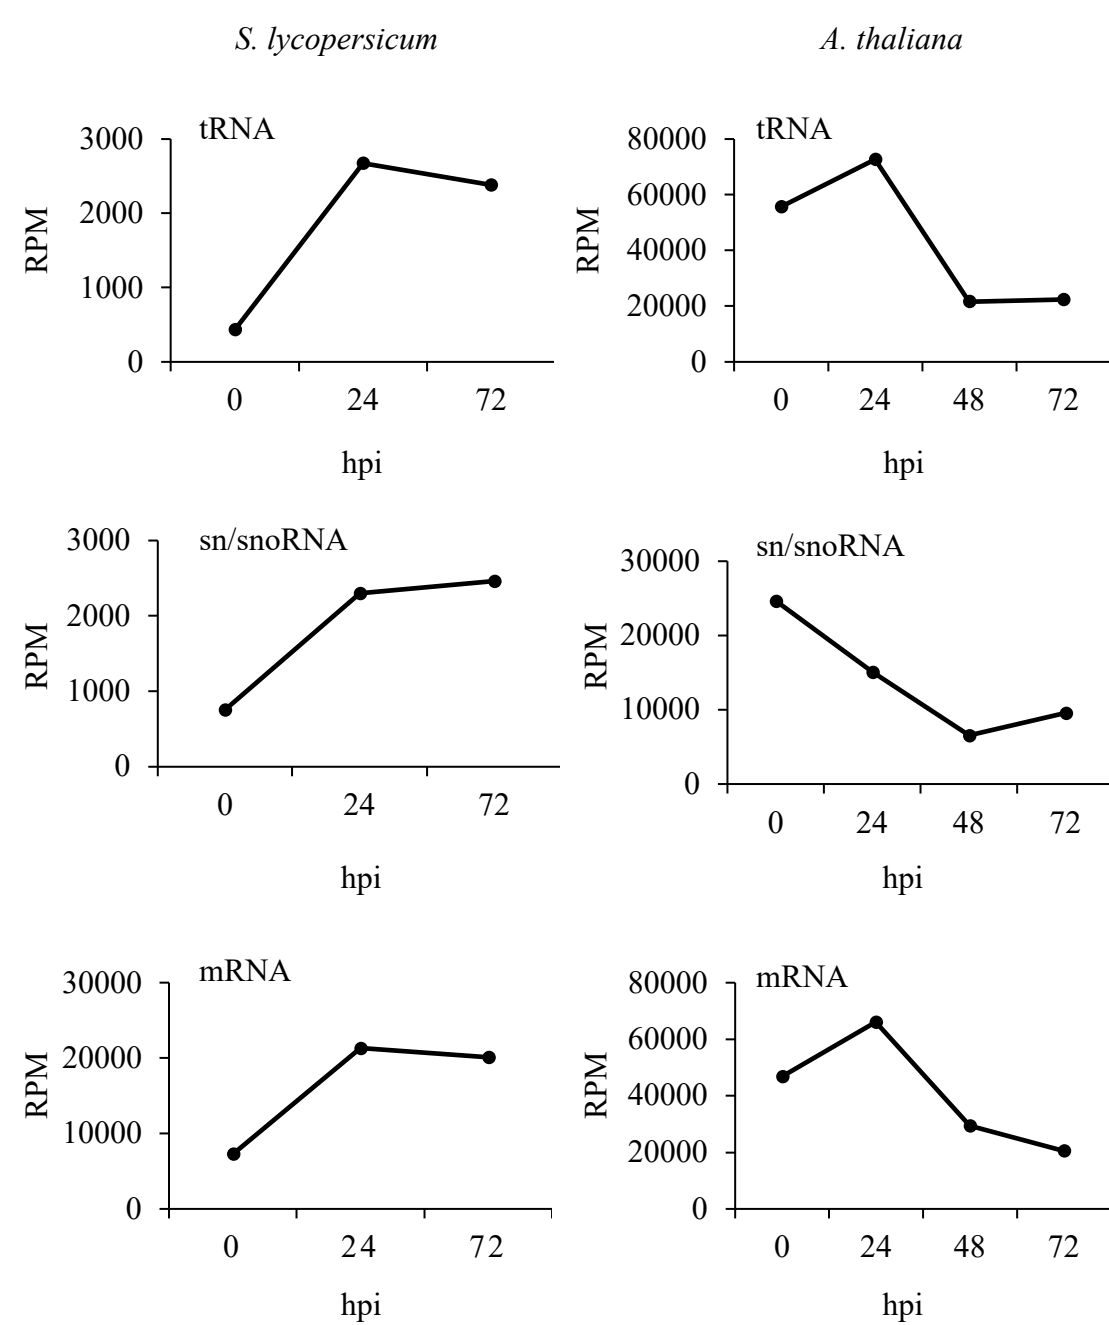

Figure S2

A

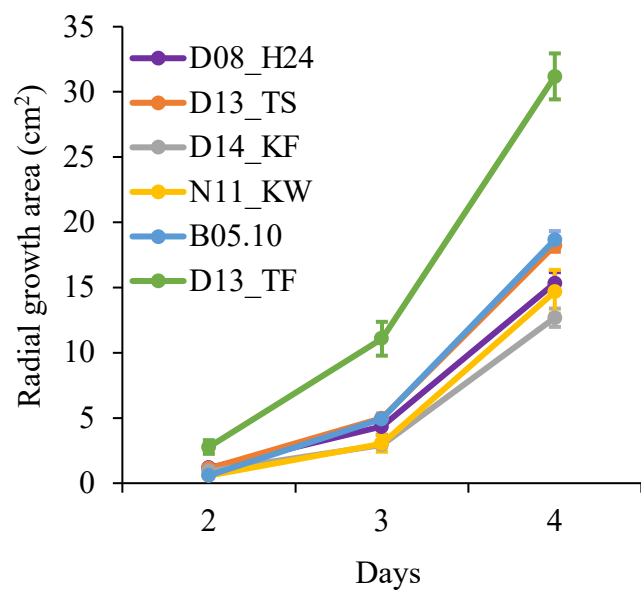

B

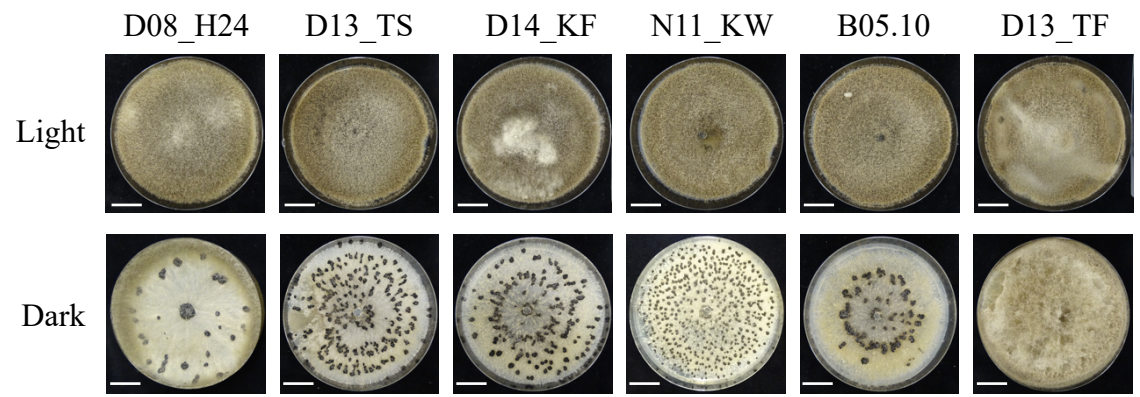

Figure S3

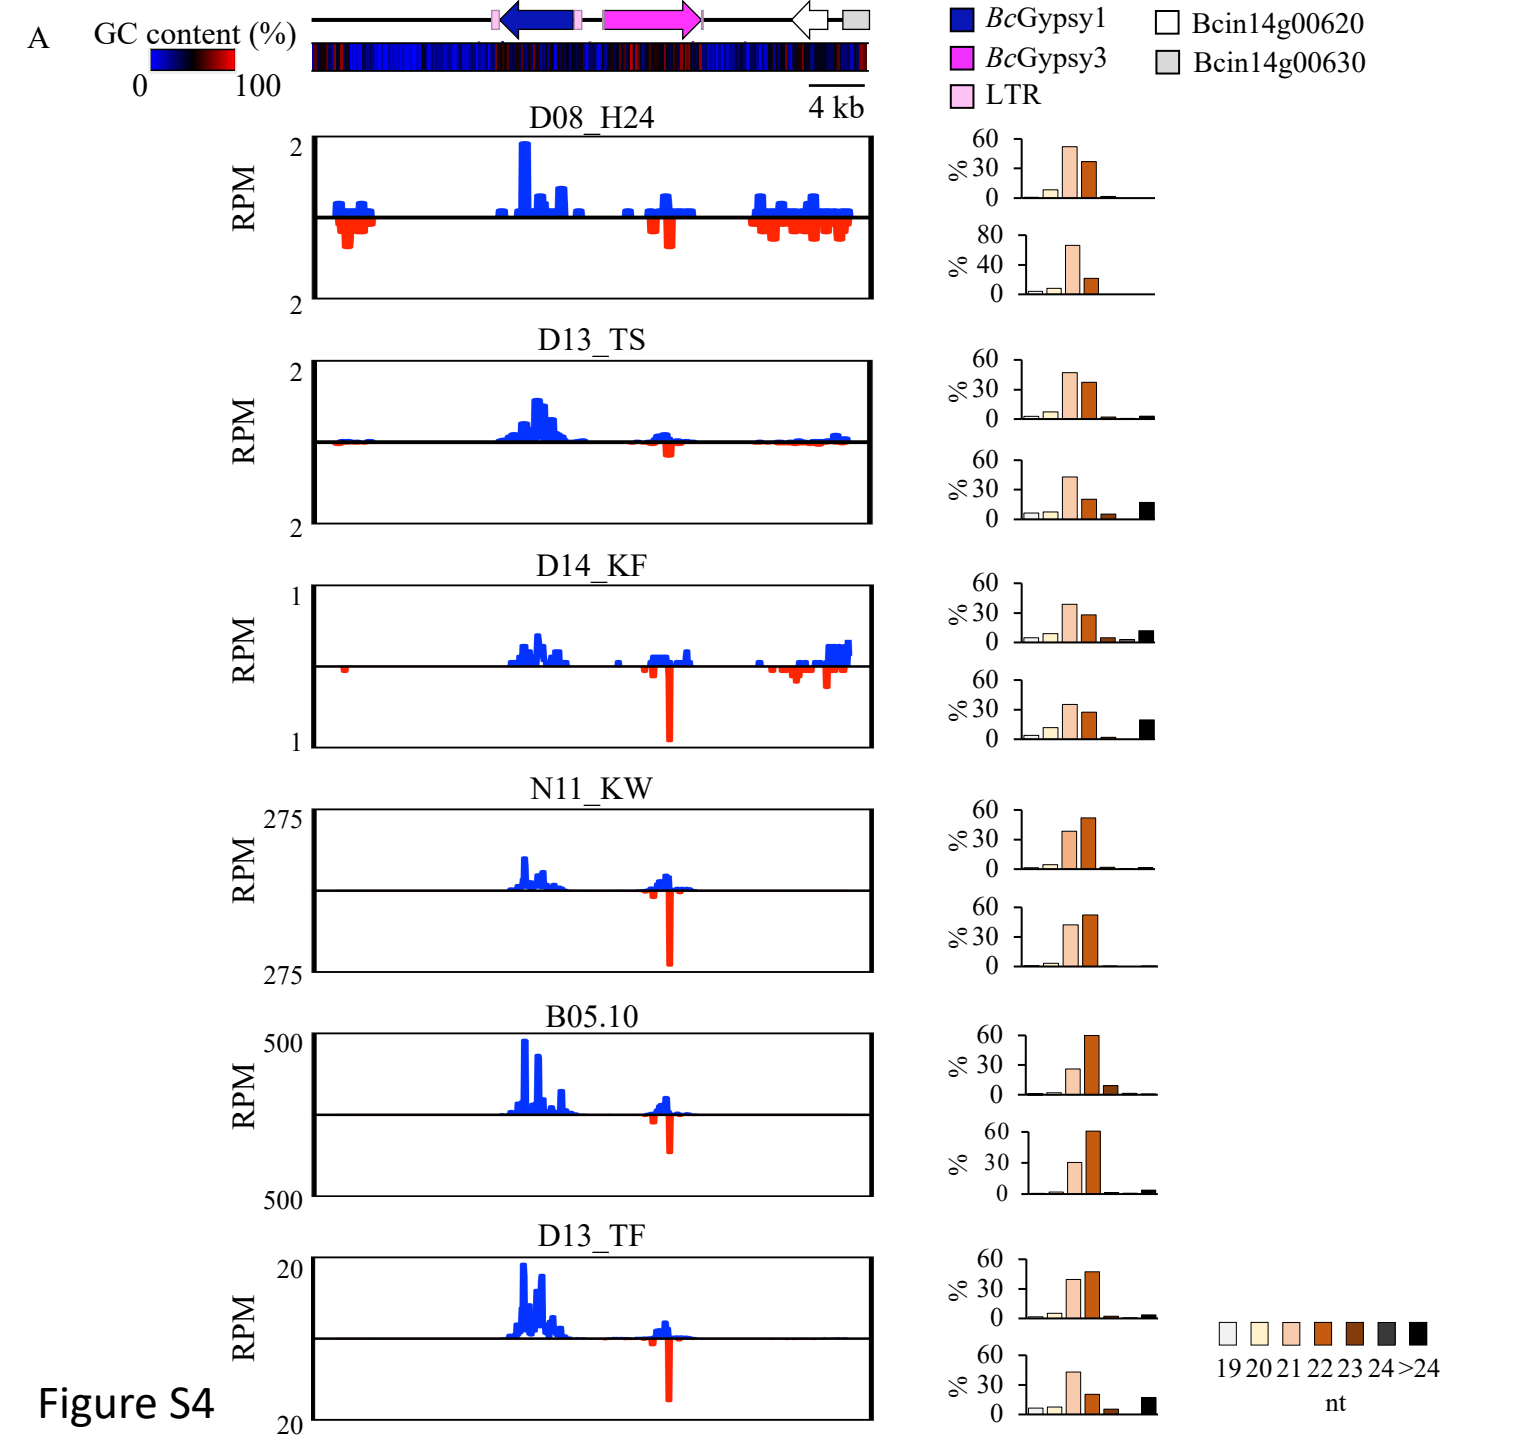

Figure S4



A

|                       | B05.10                             | D08_H24                            | D14_KF                             |
|-----------------------|------------------------------------|------------------------------------|------------------------------------|
| <i>BcGypsy1</i>       | 357,565 bp<br>0.84 %               | 92,081 bp<br>0.22 %                | 164,229 bp<br>0.38 %               |
| <i>BcGypsy2</i>       | 49,141 bp<br>0.12 %                | 21,556 bp<br>0.05 %                | 64,674 bp<br>0.15 %                |
| <i>BcGypsy3</i>       | 103,916 bp<br>0.24 %               | 7,952 bp<br>0.02 %                 | 37,056 bp<br>0.09 %                |
| <i>BcGypsy4</i>       | 217,377 bp<br>0.51 %               | 45,201 bp<br>0.11 %                | 77,969 bp<br>0.18 %                |
| <i>BcCopia1</i>       | 53,275 bp<br>0.13 %                | 31,145 bp<br>0.07 %                | 7,152 bp<br>0.02 %                 |
| <i>BcCopia2</i>       | 114,550 bp<br>0.27 %               | 22,194 bp<br>0.05 %                | 70,416 bp<br>0.16 %                |
| <b>Total coverage</b> | <b>895,824 bp</b><br><b>2.10 %</b> | <b>220,129 bp</b><br><b>0.52 %</b> | <b>421,496 bp</b><br><b>0.99 %</b> |

B

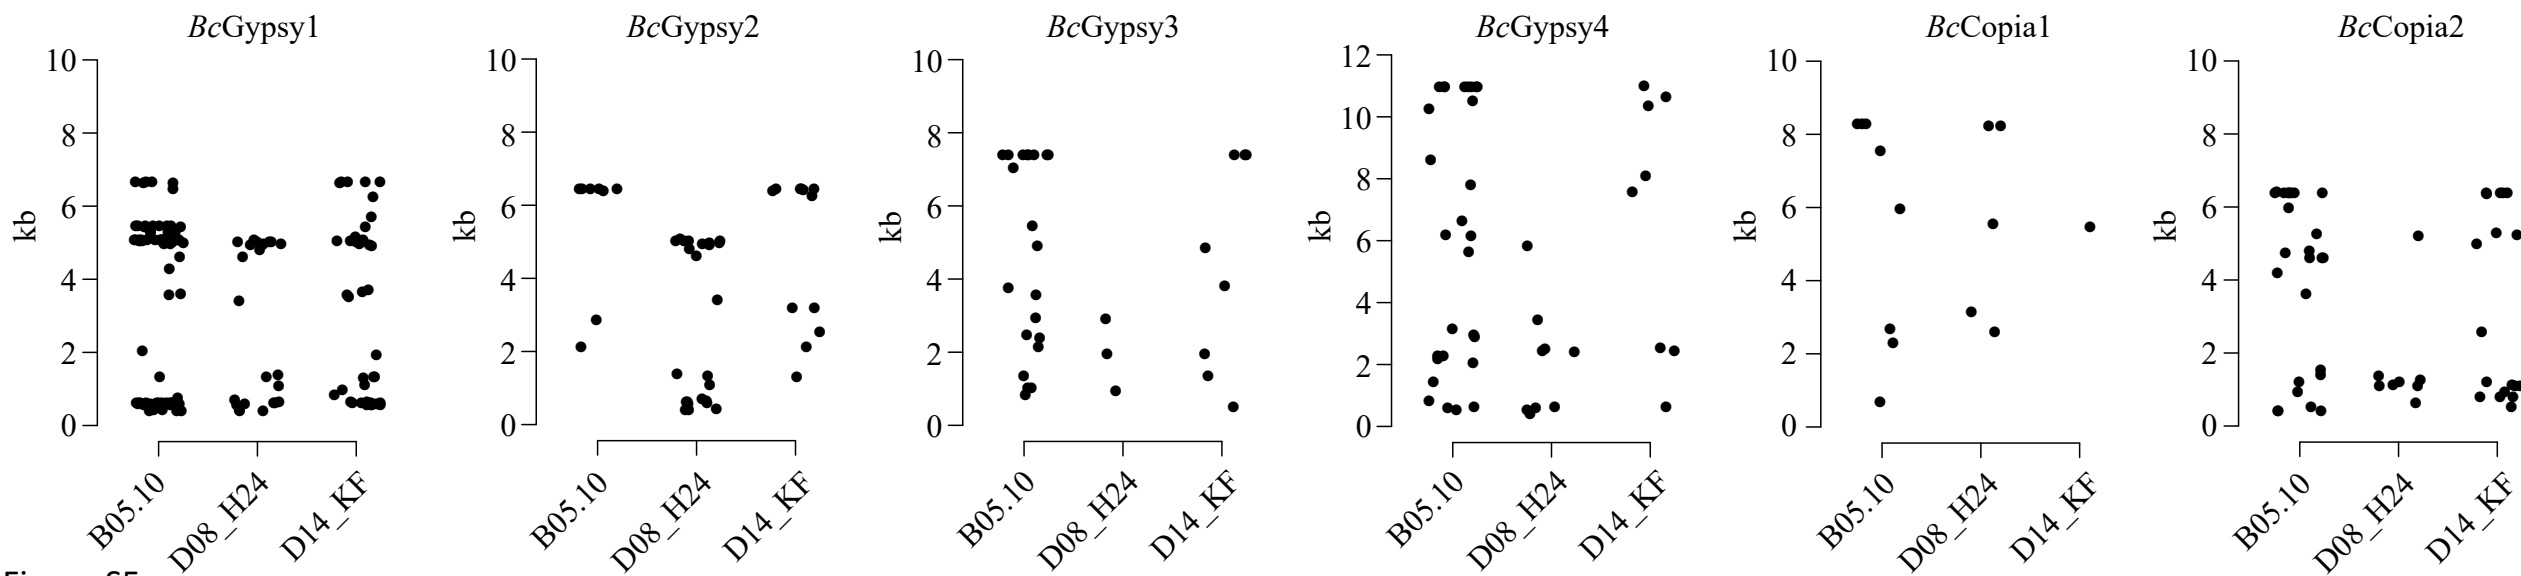

Figure S5

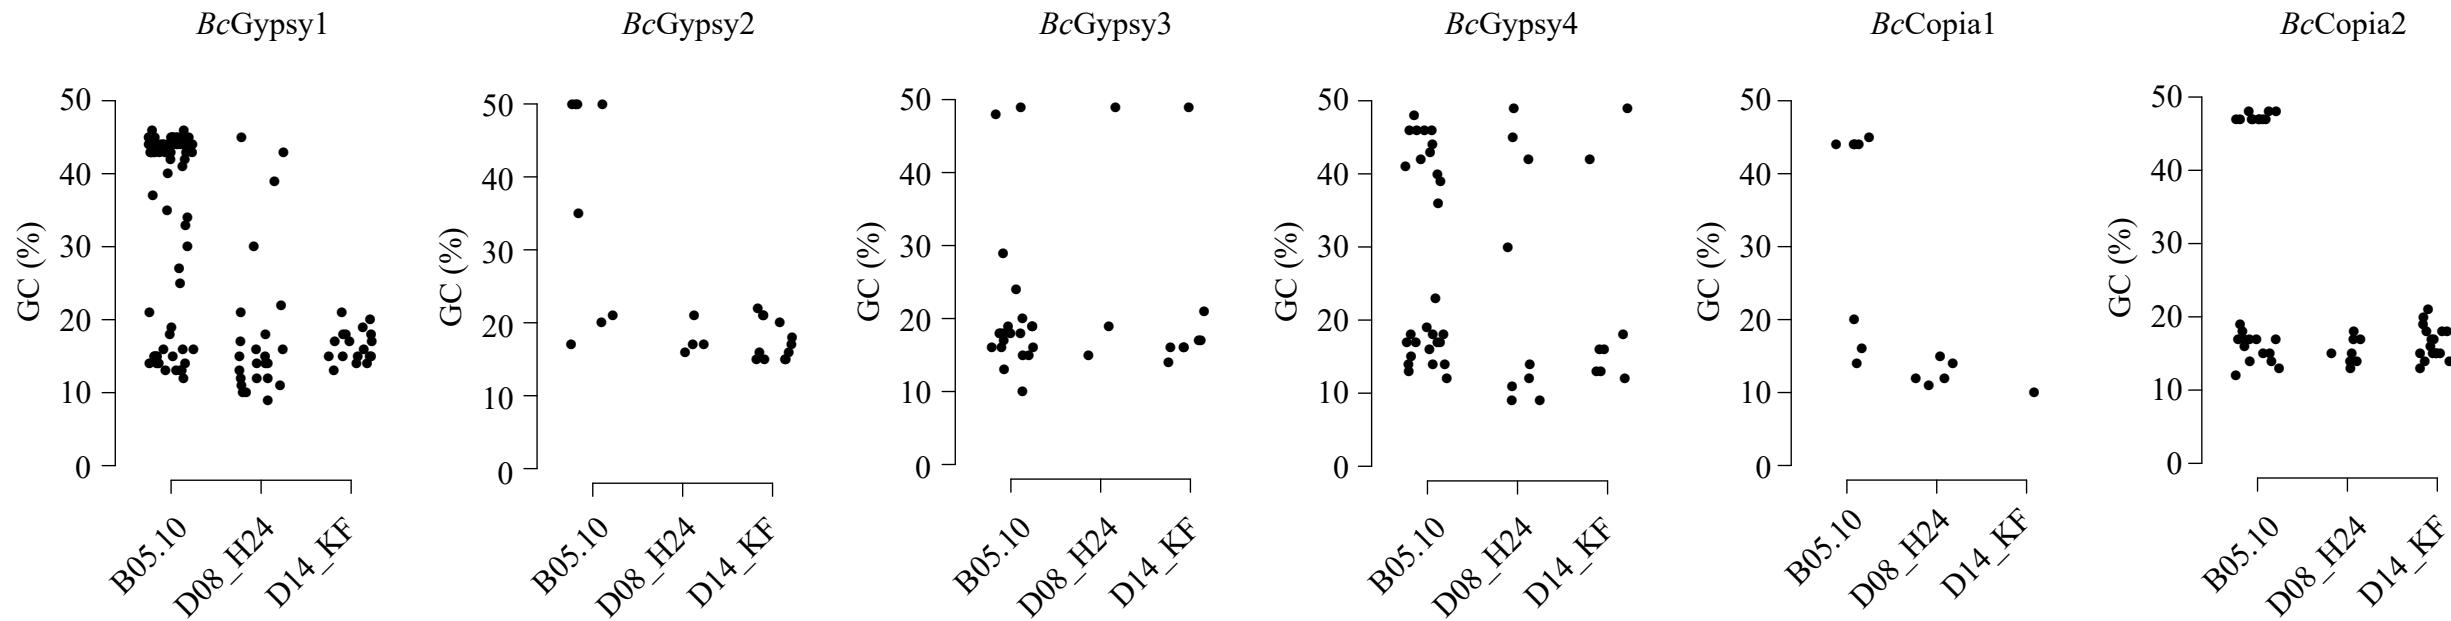

Figure S6

B05.10

D08\_H24

D14\_KF

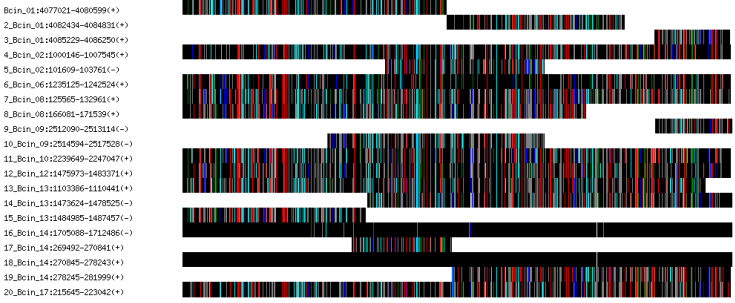

Boty3\_GCr\_ichest\_fa  
 2\_ctg9\_D08:24977-26934(-)  
 3\_ctg9\_D08:585395-588313(+)

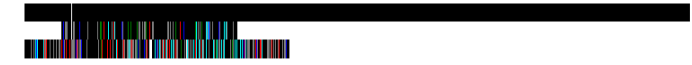

Boty3\_GCr\_ichest\_fa  
 2\_ctg10\_D14:51854-53812(-)  
 3\_ctg15\_D14:8232-9577(-)  
 4\_ctg17\_D14:363342-370734(-)  
 5\_ctg1\_D14:3218547-322933(+)  
 6\_ctg3\_D14:10148-13958(-)  
 7\_ctg8\_D14:2159726-2167132(-)  
 8\_ctg9\_D14:2523877-2528719(+)

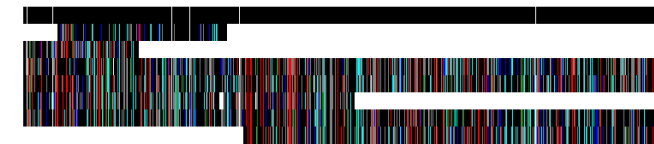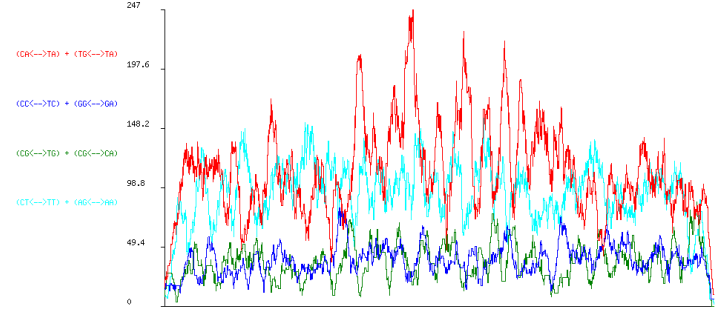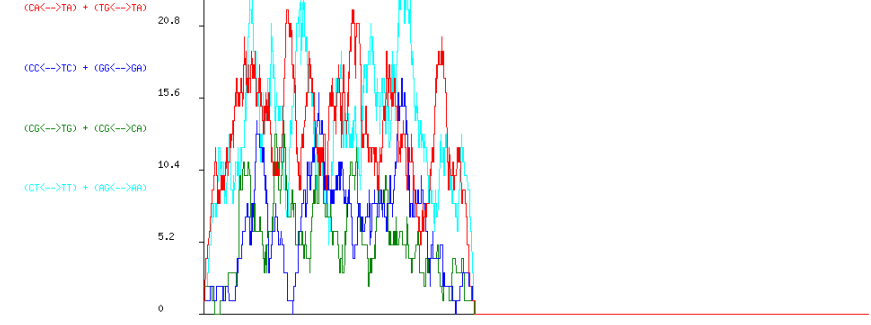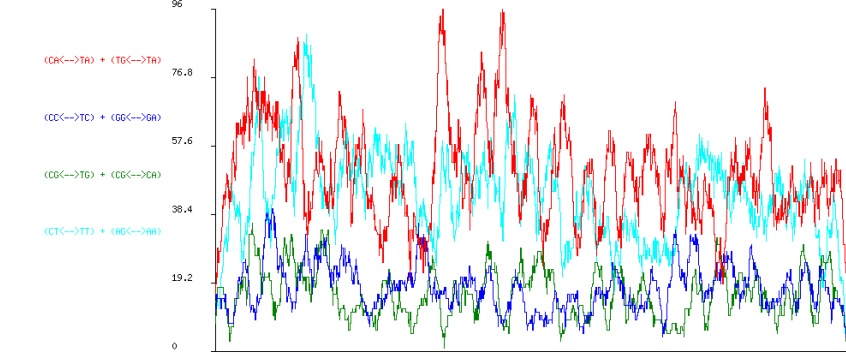

CA<->TA / TG<->TA

CC<->TC / GG<->GA

CG<->TG / CG<->CA

CT<->TT / AG<->AA

Figure S7

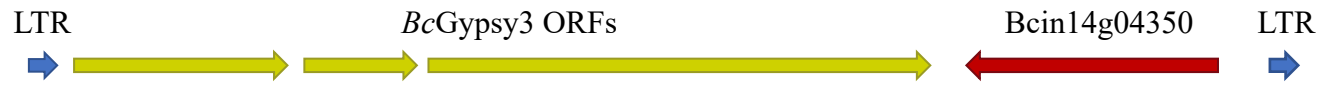

B05.10

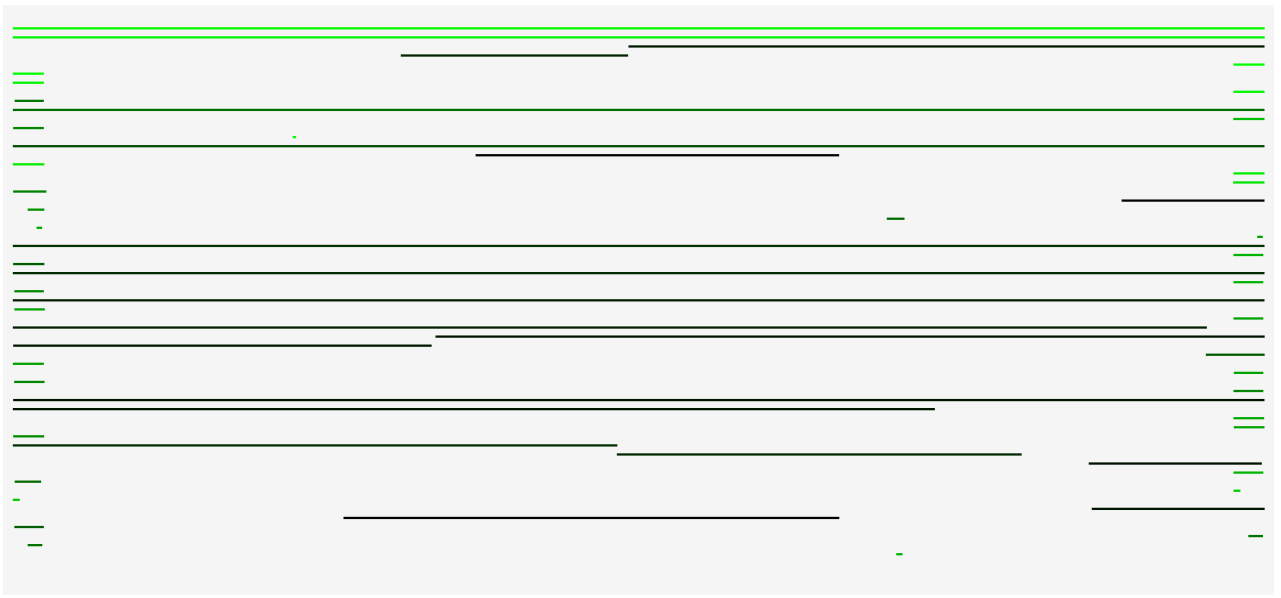

D08\_H24

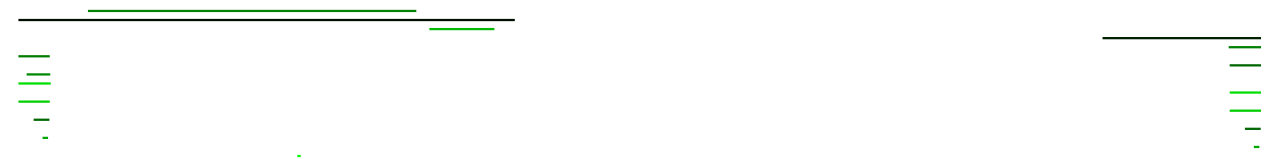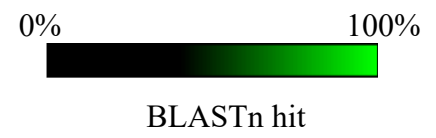

Figure S8

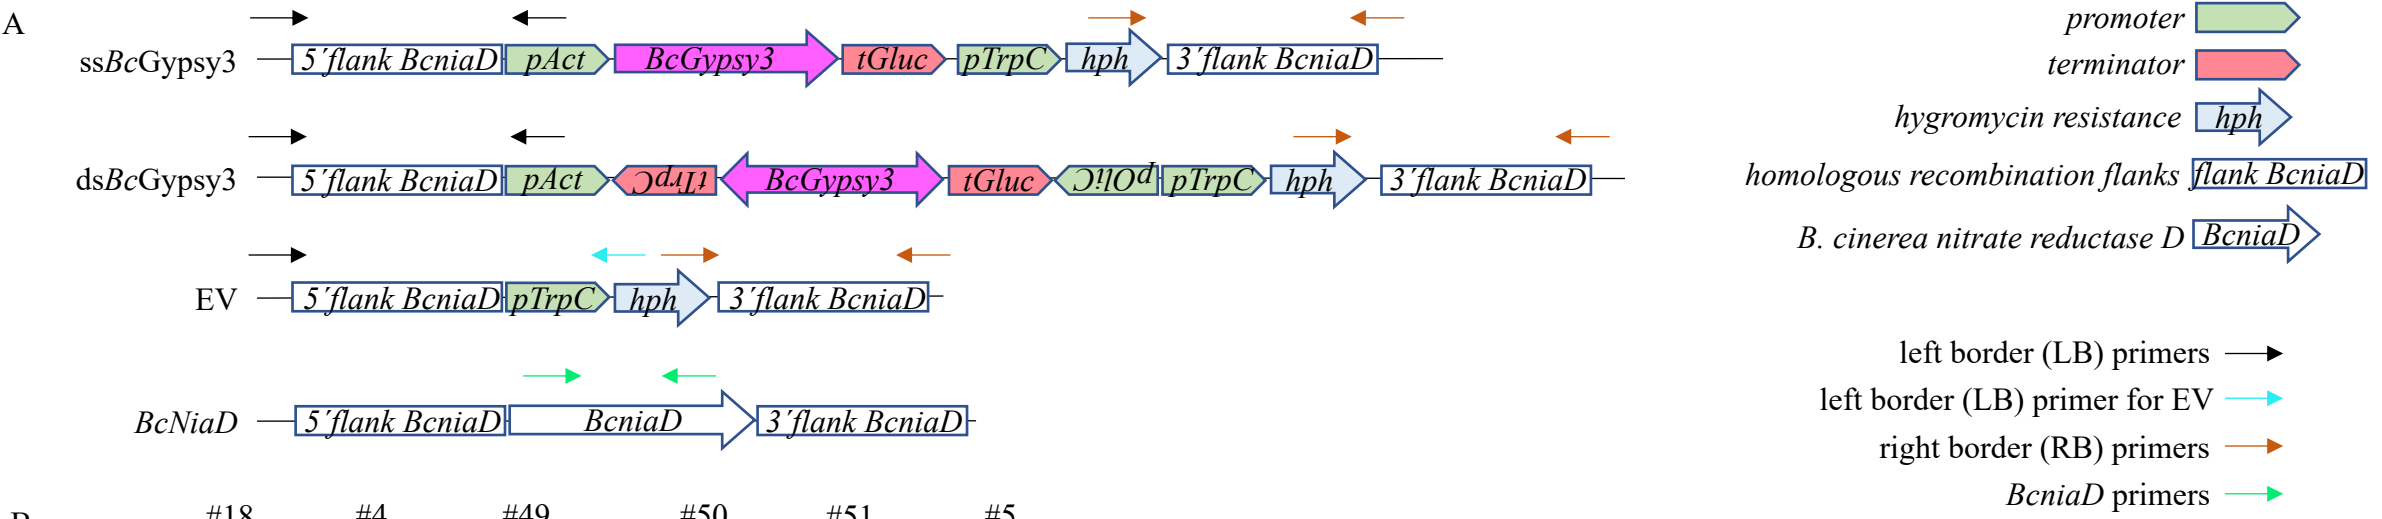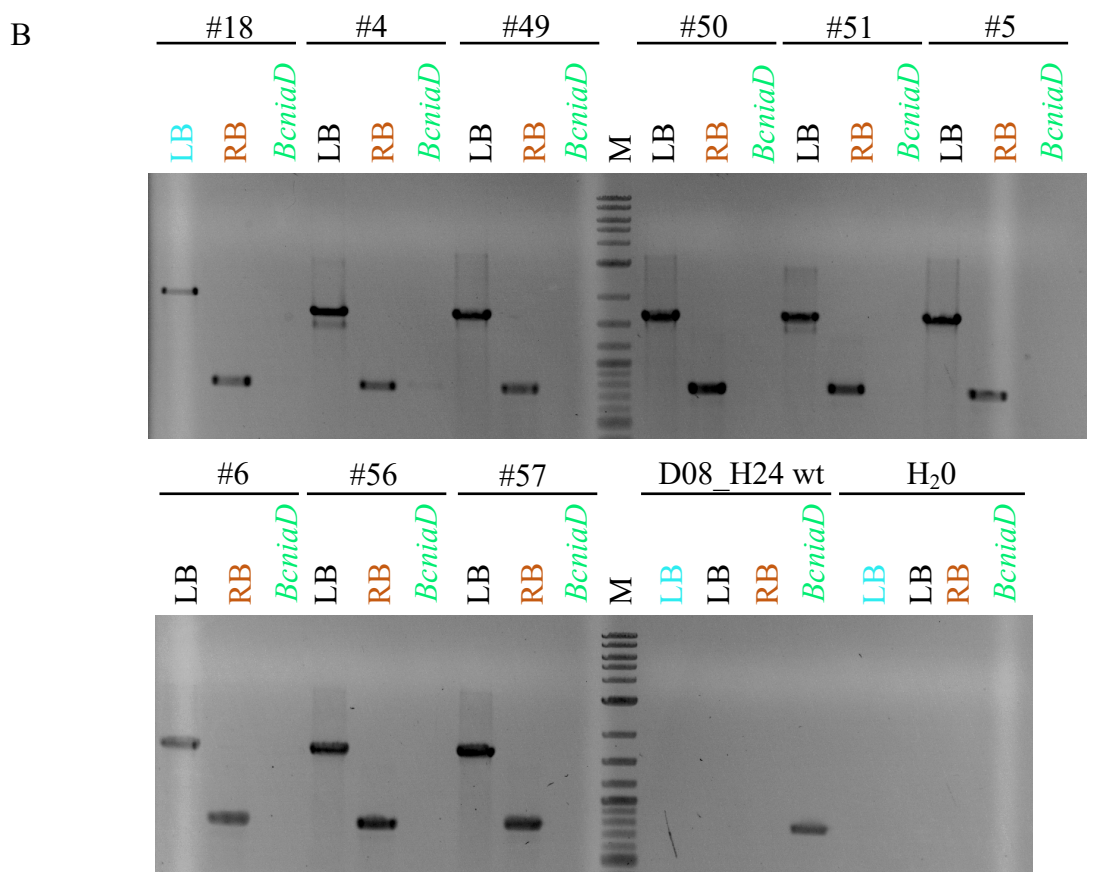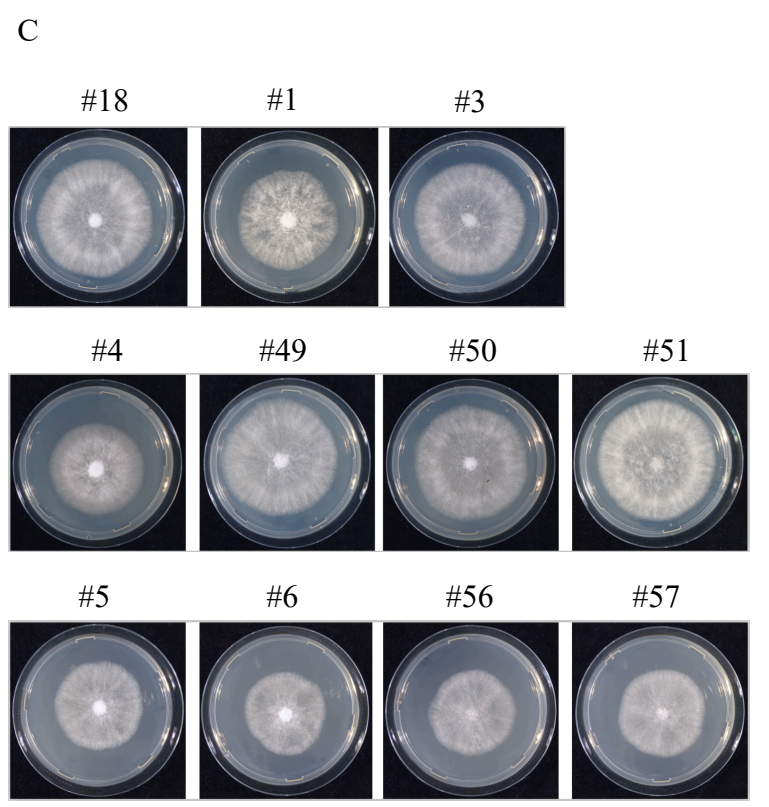

Figure S9

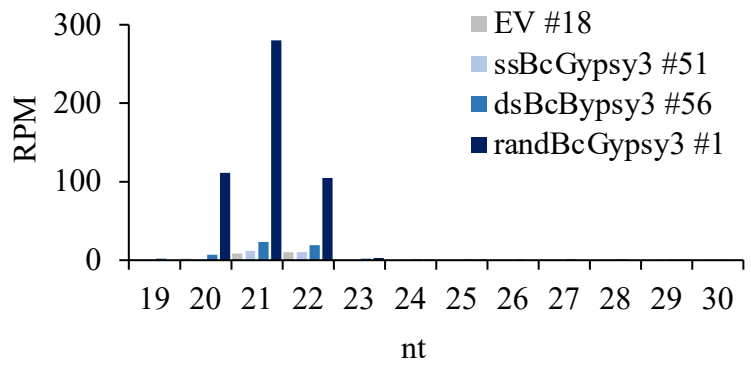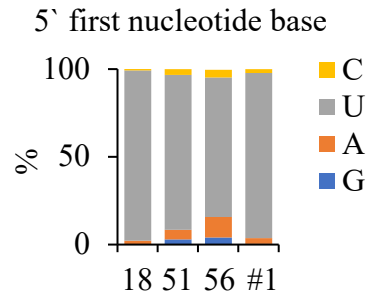

Figure S10



*B. cinerea*

mock

B05.10

18 48

18 48

hpi

|                  |      |      |      |      |
|------------------|------|------|------|------|
| <i>AT1G56090</i> | 1    | 1    | 0.7  | 0.8  |
| <i>AT3G01150</i> | 1    | 1    | 0.9  | 0.9  |
| <i>AT1G08465</i> | n.d. | n.d. | n.d. | n.d. |
| <i>AT4G12830</i> | 1    | 1    | 0.7  | 0.5  |
| <i>AT1G72430</i> | 1    | 1    | 0.6  | 0.5  |
| <i>AT1G52870</i> | 1    | 1    | 0.7  | 0.6  |
| <i>AT1G47128</i> | 1    | 1    | 0.8  | 0.3  |
| <i>AT4G35090</i> | 1    | 1    | 0.7  | 0.2  |
| <i>AT1G77060</i> | 1    | 1    | 0.7  | 0.5  |
| <i>AT1G10170</i> | 1    | 1    | 0.7  | 0.7  |
| <i>AT1G08050</i> | 1    | 1    | 3.5  | 10.9 |
| <i>AT1G17380</i> | 1    | 1    | 1.1  | 1.9  |
| <i>AT2G43150</i> | 1    | 1    | 1    | 1.5  |
| <i>AT3G10985</i> | 1    | 1    | 1.3  | 1.4  |
| <i>AT4G24350</i> | 1    | 1    | 4.8  | 3.4  |

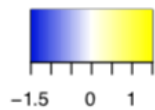

Figure S12
